# Supplementary material for: What has been missed for predicting human attention in viewing driving clips?
Source: PeerJ. 2017 Feb 1;5:e2946. doi: 10.7717/peerj.2946 (PMC5291110; doi:10.7717/peerj.2946)
Supplement: Data S1 [file peerj-05-2946-s001.xls]

## Sheet: Original data 
	Itti	Bruce	Hou	Vijay	Marat	Xu & Yue	Manipulation	Traffic condition
PI008_1	0.503909	0.550711	0.516862	0.516626	0.554839	0.564024	1	6
PI008_2	0.505274	0.523654	0.525644	0.528395	0.534903	0.543843	2	6
PI008_3	0.506617	0.52391	0.514543	0.517318	0.550066	0.555151	3	6
PI008_4	0.501909	0.520015	0.539205	0.520558	0.531364	0.563411	4	6
PIC0002_1	0.56249	0.537354	0.54808	0.548034	0.613271	0.614457	1	3
PIC0002_2	0.542899	0.450839	0.571277	0.442169	0.398038	0.594143	2	3
PIC0002_3	0.530858	0.523047	0.5745	0.528563	0.542544	0.549744	3	3
PIC0002_4	0.520714	0.536787	0.58451	0.520154	0.539678	0.541632	4	3
PIC0004_1	0.519497	0.500087	0.562887	0.523941	0.548345	0.565388	1	1
PIC0004_2	0.529358	0.521834	0.541899	0.51833	0.530089	0.551278	2	1
PIC0004_3	0.512456	0.510215	0.570329	0.519514	0.516975	0.545779	3	1
PIC0004_4	0.517269	0.509287	0.553106	0.518322	0.546653	0.544599	4	1
PIC0008_1	0.542954	0.519403	0.534569	0.534375	0.535084	0.589758	1	4
PIC0008_2	0.539376	0.486519	0.312164	0.316179	0.327802	0.539657	2	4
PIC0008_3	0.531161	0.529166	0.525165	0.526504	0.522932	0.521468	3	4
PIC0008_4	0.526291	0.538705	0.571528	0.544649	0.550228	0.507812	4	4
PIC0014_1	0.515161	0.515641	0.525184	0.510172	0.514536	0.566728	1	2
PIC0014_2	0.532286	0.505744	0.510412	0.522702	0.517103	0.546809	2	2
PIC0014_3	0.532196	0.518391	0.507121	0.523049	0.521055	0.509875	3	2
PIC0014_4	0.547074	0.53312	0.512802	0.516458	0.527982	0.540562	4	2
PIC0021_1	0.55878	0.543747	0.583257	0.533773	0.533267	0.579357	1	5
PIC0021_2	0.52634	0.534219	0.539432	0.548944	0.551014	0.54308	2	5
PIC0021_3	0.575424	0.522418	0.536735	0.517254	0.523968	0.576692	3	5
PIC0021_4	0.534277	0.534972	0.590648	0.520546	0.541231	0.547146	4	5
PIC0023_1	0.561493	0.530721	0.510947	0.526237	0.540003	0.561493	1	2
PIC0023_2	0.525702	0.5377	0.54236	0.523527	0.52108	0.525702	2	2
PIC0023_3	0.537744	0.529512	0.513021	0.532353	0.540324	0.537744	3	2
PIC0023_4	0.343843	0.524602	0.513376	0.520175	0.544287	0.532699	4	2
PIC0025_1	0.632704	0.540416	0.532399	0.663448	0.611259	0.732751	1	4
PIC0025_2	0.581177	0.524658	0.525125	0.591798	0.591549	0.599103	2	4
PIC0025_3	0.523518	0.534373	0.509209	0.543618	0.525466	0.547948	3	4
PIC0025_4	0.527491	0.537681	0.52109	0.537818	0.500451	0.561113	4	4
PIC0097_1	0.576773	0.580503	0.521546	0.624876	0.5318	0.578409	1	9
PIC0097_2	0.581209	0.534151	0.56466	0.603476	0.500451	0.547805	2	9
PIC0097_3	0.567365	0.529127	0.543328	0.583566	0.530879	0.58555	3	9
PIC0097_4	0.544339	0.538565	0.591024	0.549647	0.518701	0.546813	4	9
PIC0098_1	0.636514	0.511151	0.537792	0.515789	0.529894	0.638694	1	5
PIC0098_2	0.558177	0.519782	0.561552	0.508355	0.514698	0.58754	2	5
PIC0098_3	0.520362	0.503518	0.519211	0.51617	0.571056	0.603654	3	5
PIC0098_4	0.542773	0.511878	0.539015	0.512634	0.529263	0.556711	4	5
PIC0545_1	0.521284	0.562226	0.571754	0.520821	0.522474	0.573069	1	2
PIC0545_2	0.522686	0.510927	0.53666	0.57467	0.518991	0.533742	2	2
PIC0545_3	0.527919	0.528405	0.566212	0.526961	0.519988	0.576908	3	2
PIC0545_4	0.528375	0.542502	0.543436	0.520001	0.509646	0.507499	4	2
PIC0622_1	0.534415	0.518368	0.540927	0.528024	0.583687	0.583687	1	10
PIC0622_2	0.533344	0.509496	0.529781	0.526038	0.540464	0.540464	2	10
PIC0622_3	0.524689	0.511809	0.535862	0.525125	0.580645	0.587349	3	10
PIC0622_4	0.516911	0.511067	0.551883	0.530479	0.540662	0.561253	4	10
PIC0638_1	0.537057	0.510328	0.525807	0.552988	0.560203	0.612939	1	8
PIC0638_2	0.561284	0.517272	0.537121	0.567164	0.535309	0.553071	2	8
PIC0638_3	0.553777	0.515504	0.545984	0.548975	0.541847	0.534868	3	8
PIC0638_4	0.547703	0.518987	0.538088	0.556627	0.536181	0.540622	4	8
PIC0641_1	0.529733	0.559852	0.521131	0.512237	0.558212	0.571332	1	7
PIC0641_2	0.526365	0.525098	0.506033	0.5555	0.514647	0.558583	2	7
PIC0641_3	0.55297	0.542284	0.526865	0.522019	0.551107	0.562112	3	7
PIC0641_4	0.60012	0.527398	0.508952	0.529931	0.528044	0.535721	4	7
PIC0657_1	0.501342	0.583229	0.522083	0.500991	0.572138	0.554962	1	7
PIC0657_2	0.545629	0.556317	0.558604	0.539762	0.548758	0.541107	2	7
PIC0657_3	0.517893	0.560025	0.538848	0.509909	0.573115	0.520778	3	7
PIC0657_4	0.55214	0.561811	0.540848	0.507181	0.533239	0.553953	4	7
PIC0670_1	0.624697	0.560524	0.539397	0.530459	0.561692	0.581824	1	1
PIC0670_2	0.561971	0.505847	0.548825	0.535546	0.507994	0.549423	2	1
PIC0670_3	0.555432	0.542155	0.561314	0.546692	0.533067	0.561773	3	1
PIC0670_4	0.520834	0.530551	0.530091	0.551728	0.543515	0.524984	4	1
PIC0743_1	0.537624	0.530153	0.533326	0.543819	0.534107	0.568689	1	4
PIC0743_2	0.520417	0.522952	0.512023	0.515839	0.51765	0.55762	2	4
PIC0743_3	0.52876	0.529946	0.52832	0.53716	0.528275	0.533175	3	4
PIC0743_4	0.509632	0.533013	0.516378	0.520202	0.522416	0.536171	4	4
PIC0870_1	0.529876	0.552169	0.525709	0.52818	0.525745	0.588282	1	8
PIC0870_2	0.546597	0.547652	0.54326	0.542435	0.522187	0.565684	2	8
PIC0870_3	0.505617	0.536714	0.504623	0.550196	0.509018	0.561167	3	8
PIC0870_4	0.527791	0.523055	0.517236	0.553931	0.508561	0.540427	4	8
PICT0005_1	0.610845	0.527129	0.502008	0.55624	0.512053	0.602537	1	10
PICT0005_2	0.528704	0.507956	0.509283	0.536344	0.518038	0.540919	2	10
PICT0005_3	0.503968	0.513052	0.504605	0.539174	0.505858	0.605406	3	10
PICT0005_4	0.514367	0.504548	0.508575	0.592268	0.530295	0.5362	4	10
PICT0008_1	0.558374	0.559093	0.537035	0.535907	0.51287	0.550823	1	6
PICT0008_2	0.548056	0.519884	0.546299	0.542151	0.511627	0.548591	2	6
PICT0008_3	0.524981	0.489226	0.531094	0.509289	0.504706	0.533589	3	6
PICT0008_4	0.567318	0.448864	0.535494	0.534877	0.509372	0.545484	4	6
PICT0014_1	0.51377	0.572182	0.514939	0.523254	0.568617	0.603399	1	3
PICT0014_2	0.536662	0.530379	0.52718	0.52867	0.52218	0.531429	2	3
PICT0014_3	0.515729	0.53682	0.536019	0.541539	0.503148	0.549339	3	3
PICT0014_4	0.530025	0.529672	0.516191	0.529966	0.547315	0.548415	4	3
PICT0021_1	0.579715	0.530664	0.52793	0.545752	0.536885	0.556301	1	3
PICT0021_2	0.546693	0.523538	0.537844	0.517785	0.539468	0.554589	2	3
PICT0021_3	0.555129	0.512223	0.526815	0.531114	0.542015	0.54048	3	3
PICT0021_4	0.542927	0.516656	0.549739	0.537497	0.529192	0.52637	4	3
PICT0023_1	0.542172	0.546364	0.514749	0.515199	0.542212	0.563714	1	1
PICT0023_2	0.509522	0.530585	0.525601	0.558547	0.521779	0.528653	2	1
PICT0023_3	0.531238	0.510392	0.547473	0.536987	0.54612	0.534168	3	1
PICT0023_4	0.54958	0.546761	0.523755	0.513207	0.522122	0.546257	4	1
PICT0025_1	0.55311	0.584538	0.55207	0.54201	0.57109	0.59367	1	5
PICT0025_2	0.547372	0.564319	0.578737	0.565162	0.566046	0.552612	2	5
PICT0025_3	0.538148	0.552151	0.539909	0.535337	0.51404	0.548732	3	5
PICT0025_4	0.542485	0.533426	0.564491	0.535822	0.545059	0.555916	4	5
PICT0046_1	0.549553	0.560552	0.531193	0.501089	0.542535	0.57265	1	6
PICT0046_2	0.526468	0.525345	0.51758	0.508436	0.518155	0.521174	2	6
PICT0046_3	0.530198	0.554288	0.531383	0.519651	0.527061	0.529206	3	6
PICT0046_4	0.518642	0.536793	0.526213	0.511776	0.534671	0.523411	4	6
PICT0097_1	0.528664	0.524664	0.535924	0.540538	0.550154	0.562967	1	9
PICT0097_2	0.530588	0.529161	0.538255	0.503248	0.543893	0.549893	2	9
PICT0097_3	0.519301	0.523737	0.52619	0.513713	0.541443	0.538443	3	9
PICT0097_4	0.533999	0.534169	0.529528	0.530906	0.507512	0.544492	4	9
PICT0641_1	0.541582	0.549895	0.542981	0.566345	0.548451	0.586069	1	10
PICT0641_2	0.53524	0.528759	0.534238	0.544203	0.507949	0.542271	2	10
PICT0641_3	0.518583	0.528556	0.576066	0.53784	0.51979	0.559812	3	10
PICT0641_4	0.458043	0.514698	0.528714	0.516495	0.529138	0.545863	4	10
PICT0657_1	0.512037	0.568937	0.519249	0.517181	0.52146	0.595453	1	7
PICT0657_2	0.566985	0.575659	0.525901	0.50939	0.523119	0.561951	2	7
PICT0657_3	0.543638	0.516758	0.516181	0.513337	0.519402	0.596823	3	7
PICT0657_4	0.519877	0.5355	0.515027	0.513901	0.524407	0.552592	4	7
PICT0670_1	0.562212	0.525162	0.517923	0.500279	0.558731	0.565855	1	9
PICT0670_2	0.54145	0.5346	0.512315	0.515829	0.526086	0.541773	2	9
PICT0670_3	0.53003	0.514148	0.507715	0.518774	0.522083	0.546973	3	9
PICT0670_4	0.533001	0.517532	0.515586	0.546115	0.538744	0.542661	4	9
PICT0870_1	0.505291	0.531228	0.538184	0.554089	0.58343	0.61495	1	8
PICT0870_2	0.524904	0.528787	0.538782	0.537195	0.534312	0.550706	2	8
PICT0870_3	0.513851	0.517855	0.530406	0.531605	0.547675	0.543758	3	8
PICT0870_4	0.510699	0.422065	0.527642	0.527157	0.545781	0.535613	4	8

## Sheet: Video info
	Condition	Videos		Human Baseline	P1	P2	P3	P4	P5	P6	P7	P8	P9	P10	P11	P12	P13	P14	P15	P16	P17	P18	P19	P20	P21	P22	P23	P24	P25	P26	P27	P28	P29	P30	P31	P32	P33	P34	P35	Mean
1	Parking	PIC0004		PICT0870_1	0.822616	0.809423	0.845652		0.818231	0.838288	0.805478		0.837038	0.803845	0.810143	0.832878	0.839096	0.836529	0.819048	0.808903	0.842698	0.836332	0.821669	0.85436	0.823427	0.852109				0.847165	0.870029	0.838543	0.831669	0.839031	0.860109					0.832473	1
		PIC0670		PICT0870_2		0.847569	0.825795	0.839566	0.842485	0.8435	0.839762	0.856948	0.81049	0.827092	0.849402	0.838823	0.856994	0.838481	0.823132	0.827276	0.833894	0.817251	0.89393	0.854335	0.835978				0.820866	0.846493	0.844973	0.844042	0.85254	0.834269		0.866322		0.860419		0.84188	2
		PICT0023		PICT0870_3	0.871742			0.853408	0.818382	0.847585	0.82612	0.821467	0.832263	0.831474	0.842884	0.849326	0.863294	0.844534	0.821436	0.850251	0.84777	0.862032	0.824058	0.891867	0.892407		0.846719	0.8604		0.828487	0.858764	0.8389	0.850029	0.862624	0.857073			0.844013		0.847833	3
2	Single way single car	PIC0014		PICT0870_4	0.832888	0.86045	0.839474	0.850202	0.838627	0.81598	0.853459	0.820233	0.831953	0.837141	0.838874	0.840681	0.855473	0.842213	0.851615	0.875102	0.855517	0.870051	0.846355	0.823013	0.855722	0.851904	0.855834	0.850036	0.701041	0.858075	0.87544	0.862451	0.870353	0.863388	0.826768	0.877692	0.854541	0.855037	0.753611	0.842606	4
		PIC0023		PI008_1		0.806505	0.818765			0.82358	0.825063	0.805975	0.804957	0.810013	0.803026	0.813136	0.812461	0.80399	0.706101		0.804966	0.81722	0.821739	0.814371	0.815087	0.857704			0.816498	0.83236	0.824731		0.80682	0.820986						0.811568	1
		PIC0545		PI008_2	0.868644	0.839638	0.807814	0.832028		0.805424	0.814192	0.845833	0.813463	0.824143	0.81168	0.81072	0.818791		0.812848		0.840104	0.807985	0.817607	0.809386	0.822113	0.818734	0.833955		0.842052	0.850217	0.898485	0.849457	0.82735	0.834738		0.826253				0.829024	2
3	Single way pedestrian	PIC0002		PI008_3	0.876874	0.827516	0.867661	0.854504	0.863897		0.86615	0.790309	0.809466	0.828094	0.820221	0.830277	0.837802	0.850892	0.714621	0.820107	0.844934	0.807586	0.832902	0.83606	0.847395	0.722004	0.821969	0.830193			0.851498	0.857997	0.870869	0.843871	0.844791	0.8327		0.8641		0.832242	3
		PICT0014		PI008_4	0.861126	0.814157	0.869752		0.829779	0.865408	0.747765	0.873886	0.832335	0.822299	0.822295	0.801383	0.879711	0.851871	0.848918	0.816755	0.834139	0.816803	0.801321	0.836224	0.874494		0.817372	0.873511			0.846809	0.857742	0.800203	0.857459	0.866189			0.847543		0.838116	4
		PICT0021		PIC0002_1		0.83209	0.846951	0.821136	0.841805	0.828847	0.838302		0.833364	0.818236	0.811922	0.83015	0.835097	0.830278	0.841019	0.814149	0.814369	0.816435	0.822519	0.823557	0.823689	0.898199				0.853259	0.831083	0.846268		0.829707	0.835702	0.834178				0.832781	1
4	Single way traffic follow	PIC0008		PIC0002_2	0.705342		0.801571	0.850045	0.837821	0.707649	0.859028	0.703745	0.847347	0.839274	0.816116	0.871377	0.877873	0.865592	0.860651	0.81635	0.858317	0.835369	0.733598	0.856257	0.840773	0.85643	0.810625	0.768891		0.83089	0.858389	0.868298	0.861874	0.850567	0.861561			0.83355		0.826172	2
		PIC0025		PIC0002_3	0.851873		0.836739	0.844472		0.847801	0.85092	0.849224	0.832306	0.822663	0.851699	0.830157	0.854711	0.825613	0.849685	0.850918	0.869271	0.803617	0.869636	0.837544	0.830335	0.857392	0.817831	0.840145			0.8496	0.856807	0.863528	0.850848	0.826811			0.836599	0.799547	0.841665	3
		PIC0743		PIC0002_4	0.834142	0.829463	0.860181		0.812654	0.855985	0.863723	0.858621	0.842186	0.826241		0.838273	0.841791	0.813822		0.822926	0.828323	0.822239	0.841906	0.843434	0.837916				0.801873		0.844582	0.84405	0.841925	0.837498	0.838748					0.836771	4
5	Single way traffic opposite	PIC0021		PIC0004_1	0.71696	0.898133	0.728621		0.880354	0.814048	0.881903	0.873828	0.855081	0.875219	0.880492	0.872553	0.709576	0.863303	0.866143	0.868159	0.70456	0.715661	0.880962	0.879805	0.844415	0.894442	0.894403	0.863739			0.875009	0.725696	0.708672	0.897663	0.885724	0.899375	0.828694	0.88667		0.837737	1
		PIC0098		PIC0004_2	0.848865		0.859421	0.839984	0.822964	0.805851	0.841429		0.870108	0.812812	0.872198	0.859333	0.879328	0.842079	0.825698	0.711284	0.857262	0.854832	0.848933	0.852886	0.843908	0.841097	0.858379	0.884883			0.859115	0.885707	0.86418	0.85968		0.881354	0.831486	0.875095		0.847936	2
		PICT0025		PIC0004_3	0.861279	0.898131	0.725193	0.884943	0.716413		0.713397	0.865885	0.831313	0.834619	0.713105	0.829319	0.713509	0.701698	0.860582		0.84812	0.810224	0.880992	0.861189	0.845849	0.715626	0.871711	0.702249		0.841613		0.871065	0.875203	0.881972	0.713947	0.899436	0.821188	0.709092	0.814237	0.8101	3
6	Singleway follow opposite	PI0008		PIC0004_4	0.711489		0.856059	0.869228	0.812605	0.83194	0.850278		0.708669	0.832472		0.861164	0.839037	0.833756	0.878891	0.800783		0.823621	0.818444	0.811032	0.819781	0.765742			0.809172			0.841858	0.800197	0.850992	0.845103			0.819813		0.820505	4
		PICT0008		PIC0008_1		0.839115	0.848825	0.833918	0.847813	0.841236	0.720023	0.823418	0.849292	0.830309	0.846643	0.850649	0.851176	0.869739	0.836672	0.856354	0.86761	0.879909	0.832708	0.86456	0.854717	0.719591	0.872824		0.821717	0.850503	0.882564	0.854723		0.888307	0.876274	0.891417		0.882341		0.846165	1
		PICT0046		PIC0008_2	0.838652	0.814416	0.843214	0.830822	0.841363	0.82619	0.840043	0.819965	0.818335	0.833049	0.853296	0.842892	0.882245	0.873554	0.81935	0.82742	0.830265	0.848065	0.746594	0.860161	0.848545	0.867219	0.858598		0.815035			0.879223		0.85903	0.822248	0.873459		0.829772		0.839414	2
7	Motorway follow	PIC0641		PIC0008_3	0.880337	0.876894	0.869691	0.879471	0.89933	0.751665	0.893648	0.835595	0.816407	0.839246	0.70259	0.843866	0.889823	0.731739	0.716255		0.872359	0.836681	0.850231	0.856098	0.880206	0.844637	0.873563	0.702984	0.893294	0.858979	0.704761	0.872373	0.846417	0.724067	0.720715	0.86389	0.858674	0.727428		0.824664	3
		PIC0657		PIC0008_4	0.888838	0.822501	0.853609		0.842902	0.876949	0.804291	0.899419	0.827172	0.822717	0.824808	0.857902		0.84266	0.714055	0.828372	0.834968	0.850161	0.820686	0.810467	0.864933	0.739075	0.847969				0.853553	0.858675	0.859345	0.890652	0.840633			0.863773		0.838559	4
		PICT0657		PIC0014_1	0.884859	0.839775	0.853342	0.870571	0.87458	0.86392	0.846291	0.892455	0.820792	0.855338	0.866226	0.828868	0.829957	0.744331	0.874373	0.700525	0.845195	0.838028	0.855825	0.894759	0.861323	0.882876	0.855019	0.853601		0.823925	0.841195	0.856773	0.845888	0.838384	0.704214	0.846336	0.853038	0.845199	0.895417	0.843623	1
8	Motorway follow opposite	PIC0638		PIC0014_2	0.898642	0.835317				0.835511	0.845023	0.819907	0.844306	0.81779	0.818913	0.827	0.887433	0.811593	0.839407	0.806307	0.826259	0.809805	0.844165	0.827156	0.826262	0.824626	0.820007	0.823722			0.812529	0.829423	0.822205	0.82869	0.833475			0.824211		0.831099	2
		PIC0870		PIC0014_3	0.866724		0.841873	0.825474	0.832416	0.88125	0.878811	0.858653	0.840672	0.816428	0.833453	0.887251	0.741476	0.84381	0.818165	0.826566	0.890145	0.807355	0.860655	0.843387	0.826017	0.86164	0.804865	0.847344	0.842111	0.848739	0.832809	0.839836	0.85363	0.874392						0.842274	3
		PICT0870		PIC0014_4	0.871044	0.814331	0.84008	0.837838	0.717092	0.871939	0.856031	0.815825	0.817898	0.809943	0.818296	0.869672	0.743438	0.840711	0.820345		0.851988	0.81876		0.816302	0.828718	0.832518				0.849693	0.83182	0.86698	0.82404	0.85387	0.840254	0.844379		0.824932		0.829598	4
9	Traffic light	PIC0097		PIC0021_1	0.859307	0.823407	0.819272		0.816489	0.818672	0.828046	0.83561	0.814571	0.81022	0.81702	0.831696	0.842886	0.816467	0.852989	0.824678	0.8061	0.815204	0.80766	0.817712	0.81975	0.818549	0.818537		0.701586		0.815145	0.812827	0.804602	0.870599		0.834866		0.811452		0.819514	1
		PICT0097		PIC0021_2	0.841748				0.826733		0.816345	0.845799	0.81556	0.807715	0.82435	0.809815	0.743253	0.809654	0.89303	0.806721		0.810108	0.827895	0.823716	0.815066	0.745948	0.821375	0.826691		0.831479	0.815556	0.813305	0.81951		0.813913			0.830047		0.817413	2
		PICT0670		PIC0021_3	0.857694	0.825056	0.827948	0.83939	0.834053	0.820254	0.818689	0.834318	0.811533	0.830234	0.857125	0.886618	0.74574	0.871216	0.706122	0.8001	0.855077	0.853006	0.858077	0.862985	0.877068	0.847893	0.814325	0.857149			0.849201	0.842775	0.809344	0.827255	0.850659	0.843634	0.829927	0.836086	0.794891	0.832589	3
10	Junction	PIC0622		PIC0021_4	0.884977	0.811605	0.821309	0.817608	0.803907		0.824462		0.817166	0.804737	0.816866	0.822141	0.712354	0.848728		0.807361	0.821058	0.823258	0.824883	0.817574	0.82731	0.887781	0.822429			0.831464	0.808661	0.818436	0.806072	0.861429		0.837721		0.808996		0.821863	4
		PICT0005		PIC0023_1		0.821491	0.838387	0.82763	0.834267	0.848082	0.842223		0.845513	0.807827	0.810795	0.838914	0.837989	0.832177	0.816953	0.841962	0.81534	0.81551	0.851826	0.843094	0.849189						0.834052	0.836838	0.817057	0.839261	0.879284	0.851277		0.83285		0.834992	1
		PICT0641		PIC0023_2					0.811442		0.821726	0.801474	0.811437	0.80174	0.80016	0.823475	0.837989	0.801216	0.864778		0.805332	0.800827	0.839286				0.809005							0.811507		0.737078				0.811154	2
				PIC0023_3	0.722533	0.805049	0.828223	0.863455			0.858834	0.81341	0.850328	0.825744		0.876514	0.895943	0.844045	0.860773	0.814464	0.83777	0.809929	0.806559	0.811943	0.833435	0.71393	0.848537	0.877812		0.865565	0.845304	0.852141	0.828217	0.884095	0.877559			0.844104		0.835579	3
				PIC0023_4	0.88957	0.824374	0.833368	0.837277	0.802658	0.84769	0.882661	0.805397	0.830467	0.827484		0.712089	0.724918	0.867201			0.845893	0.819459	0.834896	0.828861	0.842802		0.804039			0.855522	0.835516	0.861629	0.804343	0.834181	0.872798	0.880171		0.820915		0.830599	4
				PIC0025_1	0.896121	0.82298	0.843317	0.829918	0.838825	0.842538	0.83748	0.849407	0.802066	0.814846	0.830868		0.877828	0.855303	0.823309	0.827975	0.833475	0.817851	0.87515	0.842041	0.843613	0.873583	0.858368	0.833762		0.888009	0.876733	0.858748	0.829808	0.826045	0.885133	0.709336		0.842475		0.841513	1
				PIC0025_2	0.852051	0.818257	0.817224	0.828589	0.877703	0.825535	0.807538	0.805885	0.883618	0.817968	0.818592	0.816516	0.782202	0.819152	0.844772	0.828545	0.818569	0.83273	0.838224	0.815301	0.850291					0.808974	0.821624	0.817142		0.826507	0.820947	0.826424		0.81689		0.826349	2
				PIC0025_3	0.83229		0.829837		0.815879	0.814067	0.842265	0.823919	0.844846		0.800943	0.820436	0.723123	0.819318	0.866516	0.834684	0.802626	0.801097	0.824661	0.812479	0.816273	0.832485					0.823441	0.824417		0.821582	0.837215					0.820191	3
				PIC0025_4	0.82875	0.827187	0.829699	0.82397	0.822036	0.834129	0.833719		0.767305	0.822625	0.813144	0.834164	0.741329	0.814083	0.822865		0.814234	0.825157	0.823161	0.822245	0.824321						0.82605	0.84662	0.820125	0.826518	0.844825	0.825196		0.81754		0.820423	4
				PIC0097_1	0.882524		0.859678	0.825941	0.838227	0.804545	0.853624	0.851015	0.801859	0.860624	0.814579	0.841943	0.80178	0.881785	0.734658	0.854829	0.861025	0.850247	0.87386	0.870342	0.85875	0.864191	0.852516	0.86209		0.840368	0.856219	0.877525	0.874539	0.843105		0.865173		0.844572		0.846738	1
				PIC0097_2	0.808069	0.840548	0.840126	0.889679	0.852874	0.879711	0.823432	0.839394	0.827469	0.847111	0.843176	0.853687		0.864952		0.816097	0.711243	0.836235	0.826325	0.837733	0.843765					0.837557	0.853992	0.875564	0.813933	0.855057	0.801043	0.859167				0.837613	2
				PIC0097_3	0.880884		0.831798		0.818034	0.823434	0.834261		0.810268	0.843833	0.815188	0.845434	0.909657	0.823383	0.730275	0.818787	0.820644	0.862593	0.816608	0.830485	0.840626	0.831363	0.862876	0.843301			0.815347	0.839964	0.871246	0.83517	0.840615	0.858302		0.83874		0.835468	3
				PIC0097_4	0.858708	0.821246	0.832905	0.824363	0.859095	0.850988	0.849426	0.859159	0.821379	0.873143	0.823789	0.875898	0.777362	0.855356	0.845389		0.852247	0.861844	0.890009	0.852924	0.838496	0.725997		0.872343		0.874244	0.706324	0.852131	0.839572	0.841532	0.827038	0.844115		0.842271		0.83831	4
				PIC0098_1	0.862066	0.835972	0.836745	0.813372	0.817897	0.843331	0.846163	0.838943	0.867336	0.81667	0.842635	0.859795	0.830751	0.84289	0.867715		0.843186	0.819282	0.816828	0.824131	0.820309	0.823129	0.835495	0.838793			0.847266	0.818828	0.843774	0.832844	0.844357	0.850319		0.824271		0.836836	1
				PIC0098_2	0.810128	0.845089	0.825237	0.825904	0.846824	0.854363	0.813856	0.822346	0.830974	0.85501	0.817749	0.816892	0.949298	0.829758				0.81864	0.822813	0.837078	0.816615	0.821698	0.834355		0.818898	0.871765		0.834705		0.824779	0.814608			0.811015		0.833477	2
				PIC0098_3	0.878538	0.824277		0.833673		0.819907	0.828803	0.815734	0.80363	0.821501	0.809085	0.824729	0.836631	0.825284	0.869564	0.81537	0.837211	0.815457	0.877531	0.831699	0.831667	0.838432	0.823881	0.814665			0.815639	0.82351	0.819454	0.814806	0.811632		0.824247	0.842299		0.828581	3
				PIC0098_4	0.848996	0.856666	0.849006	0.866016	0.860492	0.841342	0.850221	0.888219	0.837404	0.883512	0.822246	0.728068		0.726505		0.888341	0.871431	0.837423	0.899754	0.856426	0.894648	0.888862	0.867028	0.871622	0.862833		0.711139	0.875889		0.837495	0.859768	0.829682	0.810017	0.855752	0.824572	0.845206	4
				PIC0545_1	0.820104		0.832474	0.87403	0.833817	0.846162	0.832355	0.820936	0.809482	0.826978	0.869092	0.80639	0.803495	0.823599	0.862347	0.809201	0.853897	0.810883	0.847543	0.845453	0.814177	0.85216		0.86651		0.833243	0.836647	0.817871		0.835345	0.891713	0.820702		0.842707		0.835838	1
				PIC0545_2	0.850284	0.834364	0.85367	0.854153	0.850803	0.839789	0.853321	0.837938	0.835094	0.859377	0.834099	0.843217	0.818842	0.845568	0.834168	0.878067	0.888489	0.844002	0.818774	0.838556	0.836823	0.835524	0.862189	0.837659	0.826127	0.842983	0.837047	0.856617	0.851846	0.875199	0.835555	0.867889	0.842616	0.836348		0.845794	2
				PIC0545_3	0.862134	0.814163	0.855195	0.852314	0.843924	0.826739	0.846007	0.828361	0.839677	0.809419	0.846806	0.837724		0.831003	0.818413		0.837404	0.818005	0.825376	0.815288	0.81141	0.820064	0.816256	0.838475		0.814998	0.85337	0.81327	0.813176		0.831325	0.860307			0.775649	0.829526	3
				PIC0545_4	0.859769		0.833976		0.850551	0.831697	0.826524	0.803056	0.898842	0.814796	0.830744	0.849084	0.830045	0.811783	0.822317	0.803544	0.814346	0.804594	0.827598	0.832726	0.827841		0.823317	0.879568		0.820234	0.817609	0.812612	0.810455	0.825486	0.808644			0.834837		0.828807	4
				PIC0622_1	0.876731		0.816068		0.823147	0.828251	0.846376		0.816795	0.813441	0.83009	0.827745		0.823267	0.743759	0.82629	0.829156	0.832479		0.813691	0.828664	0.89449	0.818948			0.818222	0.842904	0.833081	0.825677	0.866243	0.830217	0.813437				0.828767	1
				PIC0622_2	0.84001	0.810435	0.828503		0.822798	0.829537	0.84357		0.830809	0.817732	0.843741	0.821284		0.822036	0.856648	0.833553	0.850709	0.821191	0.826787	0.813771	0.830251	0.836743			0.843377		0.854934	0.829107	0.822843	0.839174	0.823268					0.831712	2
				PIC0622_3	0.72744		0.815642	0.8153	0.823216	0.818283	0.829763	0.854666	0.847707	0.810405	0.816464	0.830045		0.826971	0.89626		0.825094	0.815956	0.855877	0.821486	0.888952	0.877505	0.812575	0.844351			0.827404	0.828905	0.837143	0.849285	0.81618	0.82306		0.822986		0.830676	3
				PIC0622_4	0.716009	0.827688	0.834021		0.804413	0.818371	0.857967	0.846818	0.805418	0.819809	0.854114	0.819077		0.822094	0.884958	0.888285	0.815065	0.812072	0.821627	0.810403	0.840176	0.878903	0.811935	0.822268	0.835991		0.839457	0.807446	0.821625	0.820116	0.806715	0.849309		0.81586		0.826934	4
				PIC0638_1	0.859688		0.839994		0.828757	0.836264	0.843959	0.829099	0.831392	0.81518	0.80774	0.82519		0.821914	0.817901	0.844917	0.822259	0.815246	0.826521	0.833743	0.815239				0.838646		0.83188	0.818757		0.823669				0.833953		0.828779	1
				PIC0638_2	0.857752		0.814226		0.806234	0.827677	0.81669	0.890575	0.81231	0.811573	0.815791	0.834007		0.826465	0.709686		0.833604	0.806975	0.828168	0.859151	0.818887		0.862414			0.834089		0.856707	0.824218	0.802138	0.846813			0.82793		0.826003	2
				PIC0638_3		0.815717	0.832516		0.811901	0.832566	0.832088	0.819032	0.802699	0.805151	0.812576	0.823136	0.77459	0.814926			0.818505	0.8108	0.82201	0.84658	0.816584	0.845095	0.855784		0.832729	0.808265		0.833984	0.837971	0.856392	0.842478	0.822721				0.824108	3
				PIC0638_4	0.84691	0.857725	0.805906		0.832013	0.858865	0.84534	0.850092	0.822709	0.805988	0.816611	0.822205	0.747202	0.816185			0.81024	0.846605	0.889082	0.837802	0.815463	0.832577				0.818926	0.815772	0.82387	0.823521	0.850627				0.814235		0.828259	4
				PIC0641_1	0.867565	0.823888	0.862006	0.812272	0.814164	0.708108	0.876669	0.812622	0.82858	0.805358	0.850296	0.808469		0.821423	0.816691	0.769957	0.861881	0.803757	0.822176	0.849778	0.816029					0.835077	0.84937	0.809489	0.851029	0.876774		0.822701				0.826005	1
				PIC0641_2	0.776302	0.814799		0.821023		0.818929	0.830221	0.818778	0.847839	0.809796	0.838239	0.818741		0.859628	0.720339	0.866521	0.841629	0.831108	0.870433	0.846446	0.841224	0.738528	0.807947			0.832506	0.845312	0.828325	0.828229	0.842854	0.888493			0.828023		0.826378	2
				PIC0641_3	0.728879	0.840475	0.85956	0.873731	0.86417	0.892111	0.892954	0.830071	0.80406	0.833417	0.845127	0.85252		0.85719	0.878049	0.845529	0.703763		0.842411	0.848086	0.883955	0.89	0.822505	0.854692	0.820152		0.868805	0.879116	0.864208	0.850042	0.879101	0.880828	0.870282	0.850061		0.848576	3
				PIC0641_4	0.884319	0.812799	0.859582		0.84171	0.855172	0.805127	0.808804	0.814451	0.80996	0.831211	0.869967		0.83798	0.885105	0.849232	0.866527	0.80686	0.804395	0.819955	0.82743	0.712814	0.803645	0.850294			0.891466	0.852012	0.854475	0.810684	0.836689			0.807788		0.832516	4
				PIC0657_1	0.897136	0.839337	0.810333			0.808731	0.826469		0.829259	0.808247	0.813307	0.817683	0.850767	0.828095		0.809598	0.817874	0.8064	0.807312	0.831434	0.816366	0.819415						0.817139		0.826909		0.807701		0.813637		0.82287	1
				PIC0657_2	0.86975	0.807378	0.816962			0.817857	0.816254	0.802043	0.81919	0.80431	0.820623	0.81759	0.815787	0.843229	0.845203		0.817418	0.805773	0.806186	0.848997	0.851692	0.843102		0.804469	0.824538	0.806638	0.825248			0.816011				0.819531		0.822631	2
				PIC0657_3	0.901519	0.80344	0.810565		0.818749	0.819644	0.810918		0.814584	0.800698	0.809523	0.827545	0.881815	0.811131		0.806035	0.817613	0.803772	0.827667	0.806965	0.811324	0.722099					0.831633	0.826449		0.809692		0.825796		0.818083		0.817386	3
				PIC0657_4	0.700968		0.844464	0.851724	0.840781	0.814878	0.857868	0.821818	0.840841	0.818978	0.822624	0.805988	0.920912	0.825485	0.83148		0.85161	0.850223	0.818403	0.856017	0.826573		0.810383			0.836888	0.871642	0.841704	0.831322	0.834431		0.830305		0.831071		0.83294	4
				PIC0670_1	0.81642	0.881824	0.815373	0.800861	0.800861	0.800861	0.800861	0.804459	0.804459	0.800861	0.804459	0.800861	0.800861	0.807881	0.804459	0.804459	0.804459	0.800861		0.800861	0.800861	0.804459	0.804459	0.815373	0.800861	0.804459	0.800861	0.800861	0.804459			0.804459	0.800861		0.912543	0.810017	1
				PIC0670_2		0.849423				0.752622						0.815657	0.822335		0.760008		0.735661		0.93112	0.821299		0.931547		0.815373	0.867789	0.883545		0.766165		0.905511	0.788941	0.897344	0.800861	0.829643		0.831936	2
				PIC0670_3	0.816141		0.814004		0.796661	0.837584	0.713014	0.806927	0.834347	0.877074	0.840539	0.894849		0.703392	0.806927		0.768399	0.837763	0.834546		0.865487		0.806927	0.809545	0.814569		0.889891	0.783445		0.745188	0.85296	0.770019	0.800782	0.733294		0.80978	3
				PIC0670_4	0.914561	0.824984	0.811588	0.911309	0.776007	0.737041	0.914524	0.741963	0.864651		0.785782	0.812313	0.904937		0.870243		0.817917	0.744724	0.80836	0.926252		0.815967		0.840346	0.832766	0.817917		0.750175		0.817917	0.832766	0.749767	0.832766	0.851064		0.826245	4
				PIC0743_1	0.896257	0.87051	0.850609	0.819262	0.876504	0.833369	0.861571	0.806384	0.808967	0.811263	0.849323	0.81135	0.835709	0.828784	0.867114	0.840229	0.867346	0.804685	0.876543	0.819522	0.834513			0.805034		0.801884	0.829637	0.823884	0.852662	0.881569	0.807245	0.833926				0.838126	1
				PIC0743_2	0.825668	0.806098	0.854538		0.857208	0.842231	0.851635		0.81184	0.806057	0.813504	0.80824		0.811759	0.826574	0.850481	0.844743	0.807494	0.814959	0.834808	0.808748					0.807336	0.828422	0.834184		0.841514	0.811424	0.834387		0.810606		0.825778	2
				PIC0743_3	0.873134	0.80746	0.86885	0.825679	0.836307	0.819966	0.848455	0.874585	0.833123	0.844577	0.876103	0.858645		0.870728	0.864919	0.800141	0.704266	0.818224	0.850955	0.849098	0.864442	0.872004		0.716945		0.899551	0.820682	0.863606	0.827889	0.862716	0.823443	0.870306		0.840671		0.839582	3
				PIC0743_4	0.888033	0.806397	0.83426	0.809213		0.825103	0.958067	0.804826	0.810463	0.809458	0.805199	0.822125		0.807293		0.812999	0.82648	0.809924	0.823466	0.807694	0.815668					0.828243	0.83641	0.820414		0.867666		0.807276		0.817187		0.827244	4
				PIC0870_1	0.710381	0.80302	0.813195		0.802629	0.814375	0.811781			0.804422	0.807426	0.813575	0.802437	0.808855	0.710081	0.804478	0.803132	0.804328	0.81316	0.809467	0.803109	0.851066				0.809279	0.854258	0.815361		0.826735	0.802618					0.804132	1
				PIC0870_2	0.721143	0.860185	0.858016	0.869956	0.858177	0.83003	0.853148		0.810831	0.815634	0.873476	0.862833		0.884278	0.894849		0.858485	0.821029	0.878337	0.88251	0.716834	0.869192	0.832567	0.701433	0.819954		0.892387	0.718156	0.846702	0.829721	0.840614	0.704564	0.801352	0.893213	0.831246	0.830027	2
				PIC0870_3	0.87338	0.882686	0.889338	0.856592	0.867687		0.713368	0.860014	0.80623	0.882644	0.850587	0.70487		0.728616	0.865413	0.864867	0.735753	0.823415	0.711404	0.706914	0.889119	0.889283	0.857814	0.888434		0.846579	0.891279	0.873206	0.845846	0.884269	0.720095	0.738435	0.805957	0.872424		0.826662	3
				PIC0870_4	0.808748	0.810752	0.823081	0.81211	0.80786	0.815688	0.823298		0.815427	0.812103	0.80871	0.808922		0.808135	0.832081	0.80716	0.805403	0.802932	0.814389	0.820502	0.830581				0.820287			0.814438	0.826378	0.817676	0.812783			0.816869		0.815053	4
				PICT0005_1	0.849965	0.890235	0.876575	0.851442	0.702459	0.827524	0.852827	0.867827	0.806406	0.856074	0.866629	0.854413	0.801945	0.874819	0.87332	0.843844	0.881176	0.884666	0.865818	0.857645	0.882672	0.880672	0.841118	0.838508		0.70103	0.715657	0.881983	0.852316	0.829029	0.853249	0.878883	0.826861	0.848456	0.865413	0.843572	1
				PICT0005_2	0.899167	0.701851	0.817057		0.818018	0.818876	0.819627	0.855549	0.705738	0.812986	0.862302	0.882037		0.851263	0.859743	0.831483	0.871544	0.817743	0.836443	0.85526	0.841394		0.858581	0.82088		0.878545	0.861107	0.895403	0.839615	0.724383	0.839172	0.863448	0.860543	0.857397	0.831424	0.835115	2
				PICT0005_3		0.824941	0.834532	0.82192	0.831657	0.81874	0.862549	0.829378	0.820176	0.833376	0.81694	0.84264		0.834941	0.808294	0.865542	0.815399	0.837274	0.86313	0.831853	0.843592	0.818232	0.837257		0.803244	0.815174	0.849833	0.826625	0.815852	0.833967	0.816444	0.827625		0.81969		0.830027	3
				PICT0005_4	0.867081	0.809727	0.812275		0.8087	0.824865	0.831198	0.816762	0.820075	0.809714	0.818392	0.822918		0.813273	0.865793	0.802359	0.809445	0.806199	0.810012	0.810215	0.813274	0.863716	0.818325						0.838033	0.838767	0.81219			0.804965		0.821931	4
				PICT0008_1	0.853795	0.814725	0.838233	0.838103	0.824197	0.853098	0.829238	0.849104	0.836705	0.813206		0.859043	0.805922	0.841422			0.813515	0.839789	0.824969	0.847481	0.837031		0.84604		0.843062	0.834454	0.829681	0.867132	0.858602	0.896844	0.849354	0.872575				0.841382	1
				PICT0008_2	0.862101	0.823868			0.802964	0.820294	0.806388	0.820206	0.813931		0.827976	0.822166		0.838242	0.835729	0.814949	0.839261	0.816512	0.851562	0.825314	0.830203	0.85415	0.825549	0.873794		0.822179	0.82996	0.831371	0.819151	0.824834	0.824789					0.829132	2
				PICT0008_3		0.847791	0.831233	0.837555	0.844996	0.82756	0.847367	0.804464	0.816029	0.813899		0.836308		0.828229			0.800788	0.805384	0.806781	0.835267	0.843226	0.835088	0.838278		0.805328	0.852545	0.818631	0.879721	0.851335	0.845925	0.861593	0.833208		0.810698		0.831823	3
				PICT0008_4	0.859588	0.819094	0.862918		0.845659	0.803273	0.824427	0.826872	0.858427	0.811583				0.83079		0.853668	0.809488	0.81017	0.823516	0.817701	0.813047		0.821777	0.800963			0.840945	0.831826		0.82066	0.836145	0.818153				0.827856	4
				PICT0014_1	0.895946		0.838726		0.811677	0.864383	0.847685	0.800967	0.829366	0.829149	0.826803	0.817985	0.820426	0.827941	0.824324	0.860531	0.841061	0.803505	0.820821	0.839968	0.847606	0.884052		0.817202		0.810922	0.810735	0.841727		0.828508	0.838575	0.822463		0.823814		0.833102	1
				PICT0014_2	0.808871	0.815772	0.841506	0.825622	0.845295	0.817704	0.818011	0.82231	0.703048	0.806905	0.814105			0.811501		0.829202	0.837785	0.831042	0.823845	0.812484	0.82097	0.822932		0.803377			0.836593	0.830267	0.838561	0.816074		0.823626		0.830647		0.818771	2
				PICT0014_3	0.863738		0.837269	0.714129		0.8042	0.867429	0.856036	0.819912	0.835144	0.88519	0.80707		0.825538	0.713874	0.83232	0.842658	0.840983	0.819005	0.846969	0.85765	0.723368	0.818498	0.886372		0.845786	0.81696	0.840736	0.832291	0.849342	0.835931			0.83486		0.826902	3
				PICT0014_4	0.860669	0.87261	0.898309	0.828618	0.867725	0.857383	0.885033	0.8593	0.840612	0.850369	0.863388	0.831214		0.825009	0.850059	0.817372	0.859689	0.832052	0.837557	0.885437	0.872476	0.834847	0.856147	0.873887	0.859954	0.837128	0.876791	0.867969	0.836615	0.841354		0.874722	0.870378	0.88576	0.802457	0.854936	4
				PICT0021_1	0.806357		0.813846		0.848866	0.806796			0.804837	0.805087		0.803836		0.804237		0.802501	0.811336	0.812189	0.841285			0.813079			0.800087											0.812453	1
				PICT0021_2	0.856434	0.812428	0.813498		0.814294	0.80071	0.802572	0.809698	0.816237	0.809719		0.809192		0.809099			0.82441	0.832419	0.828736	0.824717	0.808353	0.841688			0.805097	0.815209	0.833497	0.818579		0.818126						0.818396	2
				PICT0021_3	0.883805	0.815208	0.85555		0.82497	0.81101	0.85288	0.827965	0.819209	0.821505	0.805823	0.827572		0.828272	0.865471	0.80899	0.832911	0.817872	0.814648	0.824727		0.712465	0.819771	0.814463			0.831377	0.836845	0.826412	0.835258		0.854139		0.819707		0.825512	3
				PICT0021_4	0.850235		0.82566	0.811637	0.8205	0.807127	0.84896	0.802705	0.808098		0.823094	0.8192		0.819186	0.881972	0.828308	0.828378	0.803117	0.831881	0.824998	0.831824	0.885999	0.839495	0.844052		0.817153	0.827392	0.814195		0.805278	0.810451	0.846293		0.814706		0.827568	4
				PICT0023_1	0.818667	0.842393	0.853766	0.876881		0.816233	0.86979	0.857171	0.835777	0.885719	0.851306	0.710567	0.838217	0.843271	0.86452		0.882142	0.849431	0.897331	0.896599	0.84354	0.812157	0.844042	0.864041		0.843208	0.87575	0.827863	0.860404	0.877668	0.879458			0.886808		0.851887	1
				PICT0023_2	0.856418	0.813556	0.822211		0.85725	0.853401	0.840883	0.870744	0.83815	0.842246	0.845963	0.89301		0.858911		0.854621	0.802831	0.869016	0.870831	0.84749	0.710793		0.800129		0.820205	0.844738	0.856516			0.722524	0.843301					0.834822	2
				PICT0023_3	0.846071	0.85267	0.857535		0.887399	0.816104	0.8734	0.842147	0.857394	0.874284	0.704099	0.850197		0.847678	0.875686	0.847147	0.861713	0.843985	0.853799	0.867536	0.854159	0.848702	0.851473	0.847289		0.837216	0.824297	0.854778	0.881786	0.848482	0.833911		0.805181	0.717031	0.813438	0.84118	3
				PICT0023_4	0.826021	0.80576	0.845964		0.824417	0.851676	0.708113	0.834832	0.806739	0.865497	0.808577	0.861554		0.823738	0.836829	0.843339	0.847287	0.820696	0.826926	0.898994	0.874559		0.851301					0.848203	0.803986		0.82039	0.814641				0.831252	4
				PICT0025_1	0.870931	0.863608	0.850372	0.849423	0.83707	0.83995	0.864405	0.823588	0.820224	0.822469	0.830762	0.844313		0.84457	0.859345	0.840967	0.827338	0.839119	0.879687	0.841331	0.83255		0.842478	0.862633	0.870034	0.841273	0.833589	0.853933		0.870034	0.846076	0.833589	0.833589	0.853933	0.873423	0.846769	1
				PICT0025_2	0.851412		0.831233		0.807389	0.837962	0.836739		0.853845	0.819531	0.818798	0.818757	0.766653	0.82675	0.896447		0.826538	0.813922	0.808684	0.810711	0.842371					0.800276	0.841118	0.846516	0.829126	0.803809			0.841118	0.811276	0.795681	0.825467	2
				PICT0025_3		0.8087	0.832151		0.809244	0.813321	0.815223		0.821555	0.803952		0.823173		0.830391	0.856435		0.815798	0.816802	0.81171	0.810147	0.826142					0.83542		0.819851						0.839119		0.821619	3
				PICT0025_4	0.863293	0.845967	0.895092	0.85569	0.878501	0.805767	0.713866	0.862554	0.854008	0.83956	0.804892	0.838613	0.915449	0.842346	0.856435	0.896359	0.884043	0.864947	0.881856	0.861181	0.884667	0.870616	0.860247	0.709021		0.886356	0.860214	0.853637	0.842162			0.865675	0.860214	0.874467	0.813433	0.851285	4
				PICT0046_1	0.873386			0.825259	0.836777	0.819448	0.835719	0.822883	0.823352	0.812866	0.804544	0.810829	0.853277	0.812828	0.818182	0.840301		0.811959	0.82382	0.807108	0.825499	0.709736	0.804856	0.880556		0.820514	0.83963	0.822275		0.831736	0.831768		0.83963	0.809037		0.823135	1
				PICT0046_2	0.853518	0.821749			0.852344	0.852923	0.849327		0.824077	0.836546	0.804544	0.844702		0.832995	0.804544	0.84713	0.818735	0.810529	0.823041	0.827537	0.851137	0.840724	0.840119	0.81966		0.863932	0.836016	0.828096	0.852273	0.816519	0.820359		0.836016	0.828141		0.833473	2
				PICT0046_3	0.832744		0.827755		0.830168	0.803602	0.847279		0.844111	0.813012	0.867611	0.818393		0.821617	0.809129	0.807859	0.833542	0.835573	0.856455	0.83795	0.811897	0.842085	0.820723		0.803733		0.827624	0.829904		0.812186	0.857846	0.829881	0.827624	0.835131		0.82909	3
				PICT0046_4	0.841469	0.846249	0.82155	0.830456		0.857198	0.843068		0.824614	0.826339	0.8235	0.816519		0.820288	0.806099	0.82857	0.830135	0.81785	0.893615	0.822133	0.839789	0.813484		0.800883			0.81659	0.834846	0.844092	0.83596		0.807716	0.81659	0.833664		0.82938	4
				PICT0097_1		0.856113	0.848625	0.859565	0.819361	0.889931	0.855031	0.83116	0.830125	0.83123	0.794928	0.852372	0.803093	0.873891	0.8235		0.816857	0.812458	0.844833	0.840663	0.873992	0.896576	0.837503		0.879562	0.820729	0.82276	0.836756	0.846981	0.859967	0.802148	0.869252	0.831844			0.84206	1
				PICT0097_2	0.807372		0.834027	0.830401	0.821572	0.84969	0.83028		0.83208	0.827942	0.785641	0.875527		0.861908	0.8235	0.825439	0.848362	0.862825	0.838456	0.869365	0.865607		0.856121		0.824228	0.836253	0.802746	0.85303	0.839049	0.861978	0.875028			0.835055		0.839759	2
				PICT0097_3	0.848374	0.82084	0.843904	0.82536	0.821938	0.851308	0.819508		0.802318	0.828128	0.965481	0.842115		0.833204	0.815143		0.834613	0.849468	0.822715	0.840379	0.822325		0.822249				0.81515	0.839602	0.81039	0.817227		0.816215	0.81515			0.832924	3
				PICT0097_4	0.857565	0.841218	0.883201		0.838212	0.806408	0.856963	0.858075	0.820182	0.734257	0.8235	0.876449		0.751485	0.819597		0.85955	0.707248	0.876654	0.861032	0.728536	0.784312	0.823589	0.872099			0.878292	0.872905	0.866691	0.847954	0.857891	0.836626	0.878292	0.855148		0.833584	4
				PICT0641_1	0.871056	0.835939	0.84773	0.832839	0.832446	0.879868	0.751209	0.816253	0.828384	0.833901	0.846169		0.850273	0.85926	0.846169	0.841034	0.863461	0.813202	0.81907	0.843159	0.702157					0.84097	0.828749	0.84344	0.871258	0.819299	0.842829	0.823393	0.84349			0.833107	1
				PICT0641_2	0.807255	0.824252	0.825176	0.854578	0.853599	0.82653	0.828221	0.86331	0.87356	0.812739	0.822324	0.850273		0.817299	0.846169	0.829999	0.85084	0.801947	0.824721	0.843791	0.814659	0.863743	0.800671		0.80973	0.831538	0.844407	0.82951	0.871761	0.812185	0.874171	0.852103	0.844407	0.838804		0.835758	2
				PICT0641_3	0.832345		0.824267		0.849567	0.858344	0.84382		0.83513	0.835442	0.76513	0.843693		0.836066	0.839242	0.808035		0.81131	0.883064	0.834766	0.865044	0.846971		0.816501		0.814974	0.832137	0.818419	0.837179	0.821185	0.876961		0.832137	0.820192		0.83392	3
				PICT0641_4	0.867794	0.858687	0.841555		0.857459	0.863454	0.825678	0.886138	0.854141	0.842326	0.9152	0.850943		0.878413	0.806285	0.839448	0.845304	0.830065	0.853903	0.832342	0.829422	0.881056	0.830351	0.849093		0.863289	0.850146	0.899184	0.855245	0.880859		0.865871	0.847571	0.853555	0.739434	0.851426	4
				PICT0657_1	0.846996	0.838533		0.832408		0.810351	0.8549	0.810405	0.814057	0.809885	0.809362	0.809686	0.809686	0.845393	0.809362		0.862536	0.806508	0.848859	0.835664	0.822844	0.877793	0.818955	0.842628			0.828311	0.814502	0.813145	0.819401	0.802224		0.830224	0.819505		0.826576	1
				PICT0657_2	0.821267	0.821518	0.889282	0.846829	0.851171	0.850813	0.830873	0.814049	0.821198	0.828332	0.770318	0.809686		0.854102	0.809362	0.834239	0.837737	0.859491	0.860953	0.852166	0.854055	0.850476	0.81278	0.843371	0.86197	0.838442		0.864085		0.827978	0.82869	0.83394		0.81812		0.836576	2
				PICT0657_3	0.804412	0.807654	0.820627		0.801902	0.821347	0.806396	0.809761	0.810503	0.809002	0.816441	0.816041			0.816441	0.813832	0.82902	0.809545	0.83915	0.813905	0.803906	0.832592	0.813832		0.827501	0.846068	0.810758	0.811659		0.817815			0.810319	0.801882		0.815641	3
				PICT0657_4	0.863117	0.839474	0.86094	0.849304	0.845354	0.869202	0.887077	0.839241	0.80232	0.834149	0.873521	0.85621		0.859436	0.812728		0.871532	0.864613	0.889021	0.857297	0.88807	0.718711		0.835601	0.842001	0.877854	0.844535	0.858572	0.821794	0.891962		0.859552	0.844535	0.87009	0.78581	0.848827	4
				PICT0670_1	0.870328	0.833327	0.83317	0.809834		0.883736	0.826163	0.834887	0.746873	0.82431	0.83111		0.828599	0.857149	0.83111		0.833497	0.831665	0.847218	0.816942	0.846899	0.853838		0.837266			0.871572	0.839748	0.822193	0.8349	0.832196	0.840011	0.871572			0.836671	1
				PICT0670_2	0.860025	0.832468	0.837793		0.832201	0.898258	0.871196	0.826625	0.838051	0.849263	0.810918			0.846908	0.83111	0.806135	0.867479	0.826411	0.844635	0.833733	0.830902	0.840913	0.805073				0.820539	0.830945	0.843456	0.845576	0.82633		0.819951	0.820509		0.836941	2
				PICT0670_3	0.840441	0.819108	0.819818	0.817491	0.822802	0.857727	0.889799	0.817949	0.87591	0.818608	0.751039	0.833516		0.838225	0.810104	0.834181	0.806809	0.826683	0.835001	0.842611	0.835901		0.834181	0.895428				0.836623	0.819884	0.831698	0.851948	0.815711				0.832563	3
				PICT0670_4	0.89137	0.81957	0.811085		0.810829	0.829424	0.8365	0.826623	0.801938		0.833162	0.848793		0.834522	0.833109	0.800352	0.824238	0.805878	0.834444	0.81865	0.81916	0.841741				0.812135		0.826812	0.869528		0.835147	0.810043				0.828127	4

## Sheet: Summary
	Itti	Bruce	Hou	Vijay	Marat	Xu & Yue		Itti	Bruce	Hou	Vijay	Marat	Xu & Yue		Itti	Bruce	Hou	Vijay	Marat	Xu & Yue		Itti	Bruce	Hou	Vijay	Marat	Xu & Yue		Human Base-line
PICT0870_1	0.505291	0.531228	0.538184	0.554089	0.58343	0.61495	PICT0870_2	0.524904	0.528787	0.538782	0.537195	0.534312	0.550706	PICT0870_3	0.513851	0.517855	0.530406	0.531605	0.547675	0.543758	PICT0870_4	0.510699	0.422065	0.527642	0.527157	0.545781	0.535613		0.832473	0.84188	0.847833	0.842606
PI008_1	0.503909	0.550711	0.516862	0.516626	0.554839	0.564024	PI008_2	0.505274	0.523654	0.525644	0.528395	0.534903	0.543843	PI008_3	0.506617	0.52391	0.514543	0.517318	0.550066	0.555151	PI008_4	0.501909	0.520015	0.539205	0.520558	0.531364	0.563411		0.811568	0.829024	0.832242	0.838116
PIC0002_1	0.56249	0.537354	0.54808	0.548034	0.613271	0.614457	PIC0002_2	0.542899	0.450839	0.571277	0.442169	0.398038	0.594143	PIC0002_3	0.530858	0.523047	0.5745	0.528563	0.542544	0.549744	PIC0002_4	0.520714	0.536787	0.58451	0.520154	0.539678	0.541632		0.832781	0.826172	0.841665	0.836771
PIC0004_1	0.519497	0.500087	0.562887	0.523941	0.548345	0.565388	PIC0004_2	0.529358	0.521834	0.541899	0.51833	0.530089	0.551278	PIC0004_3	0.512456	0.510215	0.570329	0.519514	0.516975	0.545779	PIC0004_4	0.517269	0.509287	0.553106	0.518322	0.546653	0.544599		0.837737	0.847936	0.8101	0.820505
PIC0008_1	0.542954	0.519403	0.534569	0.534375	0.535084	0.589758	PIC0008_2	0.539376	0.486519	0.312164	0.316179	0.327802	0.539657	PIC0008_3	0.531161	0.529166	0.525165	0.526504	0.522932	0.521468	PIC0008_4	0.526291	0.538705	0.571528	0.544649	0.550228	0.507812		0.846165	0.839414	0.824664	0.838559
PIC0014_1	0.515161	0.515641	0.525184	0.510172	0.514536	0.566728	PIC0014_2	0.532286	0.505744	0.510412	0.522702	0.517103	0.546809	PIC0014_3	0.532196	0.518391	0.507121	0.523049	0.521055	0.509875	PIC0014_4	0.547074	0.53312	0.512802	0.516458	0.527982	0.540562		0.843623	0.831099	0.842274	0.829598
PIC0021_1	0.55878	0.543747	0.583257	0.533773	0.533267	0.579357	PIC0021_2	0.52634	0.534219	0.539432	0.548944	0.551014	0.54308	PIC0021_3	0.575424	0.522418	0.536735	0.517254	0.523968	0.576692	PIC0021_4	0.534277	0.534972	0.590648	0.520546	0.541231	0.547146		0.819514	0.817413	0.832589	0.821863
PIC0023_1	0.561493	0.530721	0.510947	0.526237	0.540003	0.561493	PIC0023_2	0.525702	0.5377	0.54236	0.523527	0.52108	0.525702	PIC0023_3	0.537744	0.529512	0.513021	0.532353	0.540324	0.537744	PIC0023_4	0.343843	0.524602	0.513376	0.520175	0.544287	0.532699		0.834992	0.811154	0.835579	0.830599
PIC0025_1	0.632704	0.540416	0.532399	0.663448	0.611259	0.732751	PIC0025_2	0.581177	0.524658	0.525125	0.591798	0.591549	0.599103	PIC0025_3	0.523518	0.534373	0.509209	0.543618	0.525466	0.547948	PIC0025_4	0.527491	0.537681	0.52109	0.537818	0.500451	0.561113		0.841513	0.826349	0.820191	0.820423
PIC0097_1	0.576773	0.580503	0.521546	0.624876	0.5318	0.578409	PIC0097_2	0.581209	0.534151	0.56466	0.603476	0.500451	0.547805	PIC0097_3	0.567365	0.529127	0.543328	0.583566	0.530879	0.58555	PIC0097_4	0.544339	0.538565	0.591024	0.549647	0.518701	0.546813		0.846738	0.837613	0.835468	0.83831
PIC0098_1	0.636514	0.511151	0.537792	0.515789	0.529894	0.638694	PIC0098_2	0.558177	0.519782	0.561552	0.508355	0.514698	0.58754	PIC0098_3	0.520362	0.503518	0.519211	0.51617	0.571056	0.603654	PIC0098_4	0.542773	0.511878	0.539015	0.512634	0.529263	0.556711		0.836836	0.833477	0.828581	0.845206
PIC0545_1	0.521284	0.562226	0.571754	0.520821	0.522474	0.573069	PIC0545_2	0.522686	0.510927	0.53666	0.57467	0.518991	0.533742	PIC0545_3	0.527919	0.528405	0.566212	0.526961	0.519988	0.576908	PIC0545_4	0.528375	0.542502	0.543436	0.520001	0.509646	0.507499		0.835838	0.845794	0.829526	0.828807
PIC0622_1	0.534415	0.518368	0.540927	0.528024	0.583687	0.583687	PIC0622_2	0.533344	0.509496	0.529781	0.526038	0.540464	0.540464	PIC0622_3	0.524689	0.511809	0.535862	0.525125	0.580645	0.587349	PIC0622_4	0.516911	0.511067	0.551883	0.530479	0.540662	0.561253		0.828767	0.831712	0.830676	0.826934
PIC0638_1	0.537057	0.510328	0.525807	0.552988	0.560203	0.612939	PIC0638_2	0.561284	0.517272	0.537121	0.567164	0.535309	0.553071	PIC0638_3	0.553777	0.515504	0.545984	0.548975	0.541847	0.534868	PIC0638_4	0.547703	0.518987	0.538088	0.556627	0.536181	0.540622		0.828779	0.826003	0.824108	0.828259
PIC0641_1	0.529733	0.559852	0.521131	0.512237	0.558212	0.571332	PIC0641_2	0.526365	0.525098	0.506033	0.5555	0.514647	0.558583	PIC0641_3	0.55297	0.542284	0.526865	0.522019	0.551107	0.562112	PIC0641_4	0.60012	0.527398	0.508952	0.529931	0.528044	0.535721		0.826005	0.826378	0.848576	0.832516
PIC0657_1	0.501342	0.583229	0.522083	0.500991	0.572138	0.554962	PIC0657_2	0.545629	0.556317	0.558604	0.539762	0.548758	0.541107	PIC0657_3	0.517893	0.560025	0.538848	0.509909	0.573115	0.520778	PIC0657_4	0.55214	0.561811	0.540848	0.507181	0.533239	0.553953		0.82287	0.822631	0.817386	0.83294
PIC0670_1	0.624697	0.560524	0.539397	0.530459	0.561692	0.581824	PIC0670_2	0.561971	0.505847	0.548825	0.535546	0.507994	0.549423	PIC0670_3	0.555432	0.542155	0.561314	0.546692	0.533067	0.561773	PIC0670_4	0.520834	0.530551	0.530091	0.551728	0.543515	0.524984		0.810017	0.831936	0.80978	0.826245
PIC0743_1	0.537624	0.530153	0.533326	0.543819	0.534107	0.568689	PIC0743_2	0.520417	0.522952	0.512023	0.515839	0.51765	0.55762	PIC0743_3	0.52876	0.529946	0.52832	0.53716	0.528275	0.533175	PIC0743_4	0.509632	0.533013	0.516378	0.520202	0.522416	0.536171		0.838126	0.825778	0.839582	0.827244
PIC0870_1	0.529876	0.552169	0.525709	0.52818	0.525745	0.588282	PIC0870_2	0.546597	0.547652	0.54326	0.542435	0.522187	0.565684	PIC0870_3	0.505617	0.536714	0.504623	0.550196	0.509018	0.561167	PIC0870_4	0.527791	0.523055	0.517236	0.553931	0.508561	0.540427		0.804132	0.830027	0.826662	0.815053
PICT0005_1	0.610845	0.527129	0.502008	0.55624	0.512053	0.602537	PICT0005_2	0.528704	0.507956	0.509283	0.536344	0.518038	0.540919	PICT0005_3	0.503968	0.513052	0.504605	0.539174	0.505858	0.605406	PICT0005_4	0.514367	0.504548	0.508575	0.592268	0.530295	0.5362		0.843572	0.835115	0.830027	0.821931
PICT0008_1	0.558374	0.559093	0.537035	0.535907	0.51287	0.550823	PICT0008_2	0.548056	0.519884	0.546299	0.542151	0.511627	0.548591	PICT0008_3	0.524981	0.489226	0.531094	0.509289	0.504706	0.533589	PICT0008_4	0.567318	0.448864	0.535494	0.534877	0.509372	0.545484		0.841382	0.829132	0.831823	0.827856
PICT0014_1	0.51377	0.572182	0.514939	0.523254	0.568617	0.603399	PICT0014_2	0.536662	0.530379	0.52718	0.52867	0.52218	0.531429	PICT0014_3	0.515729	0.53682	0.536019	0.541539	0.503148	0.549339	PICT0014_4	0.530025	0.529672	0.516191	0.529966	0.547315	0.548415		0.833102	0.818771	0.826902	0.854936
PICT0021_1	0.579715	0.530664	0.52793	0.545752	0.536885	0.556301	PICT0021_2	0.546693	0.523538	0.537844	0.517785	0.539468	0.554589	PICT0021_3	0.555129	0.512223	0.526815	0.531114	0.542015	0.54048	PICT0021_4	0.542927	0.516656	0.549739	0.537497	0.529192	0.52637		0.812453	0.818396	0.825512	0.827568
PICT0023_1	0.542172	0.546364	0.514749	0.515199	0.542212	0.563714	PICT0023_2	0.509522	0.530585	0.525601	0.558547	0.521779	0.528653	PICT0023_3	0.531238	0.510392	0.547473	0.536987	0.54612	0.534168	PICT0023_4	0.54958	0.546761	0.523755	0.513207	0.522122	0.546257		0.851887	0.834822	0.84118	0.831252
PICT0025_1	0.55311	0.584538	0.55207	0.54201	0.57109	0.59367	PICT0025_2	0.547372	0.564319	0.578737	0.565162	0.566046	0.552612	PICT0025_3	0.538148	0.552151	0.539909	0.535337	0.51404	0.548732	PICT0025_4	0.542485	0.533426	0.564491	0.535822	0.545059	0.555916		0.846769	0.825467	0.821619	0.851285
PICT0046_1	0.549553	0.560552	0.531193	0.501089	0.542535	0.57265	PICT0046_2	0.526468	0.525345	0.51758	0.508436	0.518155	0.521174	PICT0046_3	0.530198	0.554288	0.531383	0.519651	0.527061	0.529206	PICT0046_4	0.518642	0.536793	0.526213	0.511776	0.534671	0.523411		0.823135	0.833473	0.82909	0.82938
PICT0097_1	0.528664	0.524664	0.535924	0.540538	0.550154	0.562967	PICT0097_2	0.530588	0.529161	0.538255	0.503248	0.543893	0.549893	PICT0097_3	0.519301	0.523737	0.52619	0.513713	0.541443	0.538443	PICT0097_4	0.533999	0.534169	0.529528	0.530906	0.507512	0.544492		0.84206	0.839759	0.832924	0.833584
PICT0641_1	0.541582	0.549895	0.542981	0.566345	0.548451	0.586069	PICT0641_2	0.53524	0.528759	0.534238	0.544203	0.507949	0.542271	PICT0641_3	0.518583	0.528556	0.576066	0.53784	0.51979	0.559812	PICT0641_4	0.458043	0.514698	0.528714	0.516495	0.529138	0.545863		0.833107	0.835758	0.83392	0.851426
PICT0657_1	0.512037	0.568937	0.519249	0.517181	0.52146	0.595453	PICT0657_2	0.566985	0.575659	0.525901	0.50939	0.523119	0.561951	PICT0657_3	0.543638	0.516758	0.516181	0.513337	0.519402	0.596823	PICT0657_4	0.519877	0.5355	0.515027	0.513901	0.524407	0.552592		0.826576	0.836576	0.815641	0.848827
PICT0670_1	0.562212	0.525162	0.517923	0.500279	0.558731	0.565855	PICT0670_2	0.54145	0.5346	0.512315	0.515829	0.526086	0.541773	PICT0670_3	0.53003	0.514148	0.507715	0.518774	0.522083	0.546973	PICT0670_4	0.533001	0.517532	0.515586	0.546115	0.538744	0.542661		0.836671	0.836941	0.832563	0.828127
Mean	0.549454	0.5429	0.532928	0.537089	0.549301	0.586474		0.539424	0.524454	0.528628	0.527593	0.517513	0.550107		0.530985	0.525324	0.533168	0.53011	0.532522	0.553282		0.524348	0.522489	0.536806	0.530701	0.530524	0.541547		0.832306	0.830867	0.829956	0.832891
SD	0.037149	0.0230381	0.0177744	0.0341043	0.0261322	0.0346428		0.0184777	0.0225175	0.044819	0.0500043	0.0468565	0.0180085		0.017907	0.0154439	0.0206699	0.0154363	0.0198399	0.0246597		0.0415146	0.026929	0.0238138	0.0180292	0.0135057	0.0137493		0.0120108	0.00843512	0.00967995	0.00999708

## Sheet: Traffic1
	Itti	Bruce	Hou	Vijay	Marat	Xu & Yue		Itti	Bruce	Hou	Vijay	Marat	Xu & Yue		Itti	Bruce	Hou	Vijay	Marat	Xu & Yue		Itti	Bruce	Hou	Vijay	Marat	Xu & Yue
PIC0004_1	0.519497	0.500087	0.562887	0.523941	0.548345	0.565388	PIC0004_2	0.529358	0.521834	0.541899	0.51833	0.530089	0.551278	PIC0004_3	0.512456	0.510215	0.570329	0.519514	0.516975	0.545779	PIC0004_4	0.517269	0.509287	0.553106	0.518322	0.546653	0.544599
PIC0670_1	0.624697	0.560524	0.539397	0.530459	0.561692	0.581824	PIC0670_2	0.561971	0.505847	0.548825	0.535546	0.507994	0.549423	PIC0670_3	0.555432	0.542155	0.561314	0.546692	0.533067	0.561773	PIC0670_4	0.520834	0.530551	0.530091	0.551728	0.543515	0.524984
PICT0023_1	0.542172	0.546364	0.514749	0.515199	0.542212	0.563714	PICT0023_2	0.509522	0.530585	0.525601	0.558547	0.521779	0.528653	PICT0023_3	0.531238	0.510392	0.547473	0.536987	0.54612	0.534168	PICT0023_4	0.54958	0.546761	0.523755	0.513207	0.522122	0.546257
Mean	0.562122	0.535658	0.539011	0.5232	0.55075	0.570309		0.533617	0.519422	0.538775	0.537474	0.519954	0.543118		0.533042	0.520921	0.559705	0.534398	0.532054	0.54724		0.529228	0.528866	0.535651	0.527752	0.53743	0.538613
SD	0.0553648	0.0316088	0.0240713	0.00765696	0.00996014	0.0100076		0.0264826	0.0125441	0.011923	0.0201777	0.01116	0.0125613		0.0215447	0.0183897	0.0115126	0.0137728	0.0145989	0.0138604		0.0177155	0.0187937	0.0154452	0.0209205	0.0133496	0.0118324

## Sheet: Traffic2
	Itti	Bruce	Hou	Vijay	Marat	Xu & Yue		Itti	Bruce	Hou	Vijay	Marat	Xu & Yue		Itti	Bruce	Hou	Vijay	Marat	Xu & Yue		Itti	Bruce	Hou	Vijay	Marat	Xu & Yue
PIC0014_1	0.515161	0.515641	0.525184	0.510172	0.514536	0.566728	PIC0014_2	0.532286	0.505744	0.510412	0.522702	0.517103	0.546809	PIC0014_3	0.532196	0.518391	0.507121	0.523049	0.521055	0.509875	PIC0014_4	0.547074	0.53312	0.512802	0.516458	0.527982	0.540562
PIC0023_1	0.561493	0.530721	0.510947	0.526237	0.540003	0.561493	PIC0023_2	0.525702	0.5377	0.54236	0.523527	0.52108	0.525702	PIC0023_3	0.537744	0.529512	0.513021	0.532353	0.540324	0.537744	PIC0023_4	0.343843	0.524602	0.513376	0.520175	0.544287	0.532699
PIC0545_1	0.521284	0.562226	0.571754	0.520821	0.522474	0.573069	PIC0545_2	0.522686	0.510927	0.53666	0.57467	0.518991	0.533742	PIC0545_3	0.527919	0.528405	0.566212	0.526961	0.519988	0.576908	PIC0545_4	0.528375	0.542502	0.543436	0.520001	0.509646	0.507499
Mean	0.532646	0.536196	0.535962	0.519077	0.525671	0.567097		0.526891	0.518124	0.529811	0.5403	0.519058	0.535418		0.53262	0.525436	0.528785	0.527454	0.527122	0.541509		0.473097	0.533408	0.523205	0.518878	0.527305	0.52692
SD	0.0251691	0.0237702	0.031804	0.00817332	0.013031	0.0057968		0.00490927	0.0171505	0.0170398	0.0297684	0.00198935	0.0106528		0.00492618	0.0061262	0.032547	0.00467158	0.0114454	0.0336747		0.112327	0.00895347	0.0175232	0.00209759	0.0173304	0.0172725

## Sheet: Traffic3
	Itti	Bruce	Hou	Vijay	Marat	Xu & Yue		Itti	Bruce	Hou	Vijay	Marat	Xu & Yue		Itti	Bruce	Hou	Vijay	Marat	Xu & Yue		Itti	Bruce	Hou	Vijay	Marat	Xu & Yue
PIC0002_1	0.56249	0.537354	0.54808	0.548034	0.613271	0.614457	PIC0002_2	0.542899	0.450839	0.571277	0.442169	0.398038	0.594143	PIC0002_3	0.530858	0.523047	0.5745	0.528563	0.542544	0.549744	PIC0002_4	0.520714	0.536787	0.58451	0.520154	0.539678	0.541632
PICT0014_1	0.51377	0.572182	0.514939	0.523254	0.568617	0.603399	PICT0014_2	0.536662	0.530379	0.52718	0.52867	0.52218	0.531429	PICT0014_3	0.515729	0.53682	0.536019	0.541539	0.503148	0.549339	PICT0014_4	0.530025	0.529672	0.516191	0.529966	0.547315	0.548415
PICT0021_1	0.579715	0.530664	0.52793	0.545752	0.536885	0.556301	PICT0021_2	0.546693	0.523538	0.537844	0.517785	0.539468	0.554589	PICT0021_3	0.555129	0.512223	0.526815	0.531114	0.542015	0.54048	PICT0021_4	0.542927	0.516656	0.549739	0.537497	0.529192	0.52637
Mean	0.551992	0.546733	0.530316	0.539013	0.572924	0.591386		0.542085	0.501585	0.545434	0.496208	0.486562	0.560054		0.533905	0.52403	0.545778	0.533739	0.529236	0.546521		0.531222	0.527705	0.550147	0.529206	0.538728	0.538806
SD	0.034203	0.0222916	0.0166989	0.0136956	0.0383747	0.0308832		0.00506484	0.0440805	0.0230074	0.0471146	0.0771498	0.0317121		0.019876	0.0123279	0.0252961	0.00687465	0.0225941	0.00523558		0.0111548	0.0102086	0.0341613	0.00869646	0.00909875	0.011291

## Sheet: Traffic4
	Itti	Bruce	Hou	Vijay	Marat	Xu & Yue		Itti	Bruce	Hou	Vijay	Marat	Xu & Yue		Itti	Bruce	Hou	Vijay	Marat	Xu & Yue		Itti	Bruce	Hou	Vijay	Marat	Xu & Yue
PIC0008_1	0.542954	0.519403	0.534569	0.534375	0.535084	0.589758	PIC0008_2	0.539376	0.486519	0.312164	0.316179	0.327802	0.539657	PIC0008_3	0.531161	0.529166	0.525165	0.526504	0.522932	0.521468	PIC0008_4	0.526291	0.538705	0.571528	0.544649	0.550228	0.507812
PIC0025_1	0.632704	0.540416	0.532399	0.663448	0.611259	0.732751	PIC0025_2	0.581177	0.524658	0.525125	0.591798	0.591549	0.599103	PIC0025_3	0.523518	0.534373	0.509209	0.543618	0.525466	0.547948	PIC0025_4	0.527491	0.537681	0.52109	0.537818	0.500451	0.561113
PIC0743_1	0.537624	0.530153	0.533326	0.543819	0.534107	0.568689	PIC0743_2	0.520417	0.522952	0.512023	0.515839	0.51765	0.55762	PIC0743_3	0.52876	0.529946	0.52832	0.53716	0.528275	0.533175	PIC0743_4	0.509632	0.533013	0.516378	0.520202	0.522416	0.536171
Mean	0.571094	0.529991	0.533431	0.580547	0.56015	0.630399		0.54699	0.511376	0.449771	0.474605	0.479	0.56546		0.527813	0.531162	0.520898	0.535761	0.525558	0.534197		0.521138	0.536466	0.536332	0.534223	0.524365	0.535032
SD	0.0534223	0.0105074	0.00108883	0.0719492	0.0442644	0.0892629		0.0310874	0.021544	0.119351	0.142361	0.136055	0.0304886		0.00390851	0.00280831	0.0102451	0.00864239	0.00267268	0.0132696		0.00998254	0.00303418	0.0305715	0.0126138	0.0249457	0.0266687

## Sheet: Traffic5
	Itti	Bruce	Hou	Vijay	Marat	Xu & Yue		Itti	Bruce	Hou	Vijay	Marat	Xu & Yue		Itti	Bruce	Hou	Vijay	Marat	Xu & Yue		Itti	Bruce	Hou	Vijay	Marat	Xu & Yue
PIC0021_1	0.55878	0.543747	0.583257	0.533773	0.533267	0.579357	PIC0021_2	0.52634	0.534219	0.539432	0.548944	0.551014	0.54308	PIC0021_3	0.575424	0.522418	0.536735	0.517254	0.523968	0.576692	PIC0021_4	0.534277	0.534972	0.590648	0.520546	0.541231	0.547146
PIC0098_1	0.636514	0.511151	0.537792	0.515789	0.529894	0.638694	PIC0098_2	0.558177	0.519782	0.561552	0.508355	0.514698	0.58754	PIC0098_3	0.520362	0.503518	0.519211	0.51617	0.571056	0.603654	PIC0098_4	0.542773	0.511878	0.539015	0.512634	0.529263	0.556711
PICT0025_1	0.55311	0.584538	0.55207	0.54201	0.57109	0.59367	PICT0025_2	0.547372	0.564319	0.578737	0.565162	0.566046	0.552612	PICT0025_3	0.538148	0.552151	0.539909	0.535337	0.51404	0.548732	PICT0025_4	0.542485	0.533426	0.564491	0.535822	0.545059	0.555916
Mean	0.582801	0.546479	0.557706	0.530524	0.54475	0.603907		0.543963	0.53944	0.559907	0.54082	0.543919	0.561077		0.544645	0.526029	0.531952	0.52292	0.536355	0.576359		0.539845	0.526759	0.564718	0.523001	0.538518	0.553258
SD	0.0466028	0.0367697	0.0232507	0.013409	0.0228731	0.0309648		0.01619	0.0227229	0.0197041	0.0292618	0.026399	0.0234077		0.0281	0.0245168	0.0111473	0.0107668	0.0304595	0.0274625		0.00482418	0.0129102	0.0258172	0.0117873	0.00824015	0.00530776

## Sheet: Traffic6
	Itti	Bruce	Hou	Vijay	Marat	Xu & Yue		Itti	Bruce	Hou	Vijay	Marat	Xu & Yue		Itti	Bruce	Hou	Vijay	Marat	Xu & Yue		Itti	Bruce	Hou	Vijay	Marat	Xu & Yue
PI008_1	0.503909	0.550711	0.516862	0.516626	0.554839	0.564024	PI008_2	0.505274	0.523654	0.525644	0.528395	0.534903	0.543843	PI008_3	0.506617	0.52391	0.514543	0.517318	0.550066	0.555151	PI008_4	0.501909	0.520015	0.539205	0.520558	0.531364	0.563411
PICT0008_1	0.558374	0.559093	0.537035	0.535907	0.51287	0.550823	PICT0008_2	0.548056	0.519884	0.546299	0.542151	0.511627	0.548591	PICT0008_3	0.524981	0.489226	0.531094	0.509289	0.504706	0.533589	PICT0008_4	0.567318	0.448864	0.535494	0.534877	0.509372	0.545484
PICT0046_1	0.549553	0.560552	0.531193	0.501089	0.542535	0.57265	PICT0046_2	0.526468	0.525345	0.51758	0.508436	0.518155	0.521174	PICT0046_3	0.530198	0.554288	0.531383	0.519651	0.527061	0.529206	PICT0046_4	0.518642	0.536793	0.526213	0.511776	0.534671	0.523411
Mean	0.537279	0.556785	0.528363	0.517874	0.536748	0.562499		0.526599	0.522961	0.529841	0.526327	0.521562	0.537869		0.520599	0.522475	0.525673	0.515419	0.527278	0.539315		0.52929	0.501891	0.533637	0.522404	0.525136	0.544102
SD	0.0292336	0.00531087	0.0103799	0.0174425	0.0215747	0.0109931		0.0213913	0.00279568	0.0148124	0.0169523	0.0120061	0.0146522		0.0123863	0.0325547	0.00964023	0.00543567	0.0226808	0.0138881		0.0339796	0.0466824	0.00669204	0.0116606	0.0137515	0.0200358

## Sheet: Traffic7
	Itti	Bruce	Hou	Vijay	Marat	Xu & Yue		Itti	Bruce	Hou	Vijay	Marat	Xu & Yue		Itti	Bruce	Hou	Vijay	Marat	Xu & Yue		Itti	Bruce	Hou	Vijay	Marat	Xu & Yue
PIC0641_1	0.529733	0.559852	0.521131	0.512237	0.558212	0.571332	PIC0641_2	0.526365	0.525098	0.506033	0.5555	0.514647	0.558583	PIC0641_3	0.55297	0.542284	0.526865	0.522019	0.551107	0.562112	PIC0641_4	0.60012	0.527398	0.508952	0.529931	0.528044	0.535721
PIC0657_1	0.501342	0.583229	0.522083	0.500991	0.572138	0.554962	PIC0657_2	0.545629	0.556317	0.558604	0.539762	0.548758	0.541107	PIC0657_3	0.517893	0.560025	0.538848	0.509909	0.573115	0.520778	PIC0657_4	0.55214	0.561811	0.540848	0.507181	0.533239	0.553953
PICT0657_1	0.512037	0.568937	0.519249	0.517181	0.52146	0.595453	PICT0657_2	0.566985	0.575659	0.525901	0.50939	0.523119	0.561951	PICT0657_3	0.543638	0.516758	0.516181	0.513337	0.519402	0.596823	PICT0657_4	0.519877	0.5355	0.515027	0.513901	0.524407	0.552592
Mean	0.514371	0.570673	0.520821	0.510136	0.550603	0.573916		0.546326	0.552358	0.530179	0.534884	0.528841	0.55388		0.538167	0.539689	0.527298	0.515088	0.547875	0.559904		0.557379	0.54157	0.521609	0.517004	0.528563	0.547422
SD	0.0143386	0.0117848	0.00144221	0.0082969	0.0261817	0.0203688		0.020319	0.0255119	0.0265454	0.0234388	0.0177609	0.0111895		0.0181672	0.0217499	0.0113397	0.00624207	0.027002	0.0380705		0.0403772	0.0179915	0.0169361	0.0116882	0.00443884	0.0101562

[truncated: 4 more sheets: Traffic8, Traffic9, Traffic10, Proposed Model]
